# Supplementary material for: Exploring the potential of civic engagement to strengthen mental health systems in Indonesia (IGNITE): a study protocol
Source: Springer Nature journal article supplement (doi:10.1186/s13033-018-0227-x), 2018-08-25
Supplement: MOESM2 [file 16073016]

21 December 2017

Dear Dr Brooks

I am pleased to inform you that your application for research ethics approval has been approved. Application details and conditions of approval can be found below. Appendix A contains a list of documents approved by the Committee.

#### **Application Details**

Reference: 2715  
Project Title: Exploring the potential for civic engagement to strengthen mental health systems in Indonesia: IGNITE.  
Principal Investigator/Supervisor: Dr Helen Brooks  
Co-Investigator(s): -  
Lead Student Investigator: -  
Department: Psychological Sciences  
Approval Date: 21/12/2017  
Approval Expiry Date: Five years from the approval date listed above

The application was **APPROVED** subject to the following conditions:

#### **Conditions of approval**

- All serious adverse events must be reported via the Research Integrity and Ethics Team ([ethics@liverpool.ac.uk](mailto:ethics@liverpool.ac.uk)) within 24 hours of their occurrence.
- If you wish to extend the duration of the study beyond the research ethics approval expiry date listed above, a new application should be submitted.
- If you wish to make an amendment to the research, please create and submit an amendment form using the research ethics system.
- If the named Principal Investigator or Supervisor leaves the employment of the University during the course of this approval, the approval will lapse. Therefore it will be necessary to create and submit an amendment form using the research ethics system.
- It is the responsibility of the Principal Investigator/Supervisor to inform all the investigators of the terms of the approval.

Kind regards,

Health and Life Sciences Research Ethics Committee (Psychology, Health and Society)

[iphsrec@liverpool.ac.uk](mailto:iphsrec@liverpool.ac.uk)

0151 795 5420

#### **Appendix - Approved Documents**

(Relevant only to amendments involving changes to the study documentation)

The final document set reviewed and approved by the committee is listed below:

| <b>Document Type</b>          | <b>File Name</b>                                         | <b>Date</b> | <b>Version</b> |
|-------------------------------|----------------------------------------------------------|-------------|----------------|
| Questionnaire                 | Phase 2 survey_v1 24.07.17                               | 24/07/2017  | 1              |
| Interview Schedule            | HSRI Interview and FG Schedules V1 2.8.17                | 02/08/2017  | 1              |
| Fieldwork Risk Assessment     | Fieldwork Risk Assessment V1 15 November 2017            | 15/11/2017  | 1              |
| Evidence Of Peer Review       | MRC Review V1 15 November 2017                           | 15/11/2017  | 1              |
| Participant Consent Form      | Consent form_FGs and Interviews_SU and carer_v2 19.12.17 | 19/12/2017  | 2              |
| Participant Consent Form      | Consent form_Interview_Staff v2 19.12.17                 | 19/12/2017  | 2              |
| Advertisement                 | IGNITE Invitation letter v2 19.12.17                     | 19/12/2017  | 2              |
| Participant Consent Form      | Consent form_Survey_v2 19.12.17                          | 19/12/2017  | 2              |
| Evidence Of Peer Review       | HSRI Indonesia distress disclosure policy v3 19.12.17    | 19/12/2017  | 3              |
| Participant Information Sheet | PIS_Survey_v2 19.12.17                                   | 19/12/2017  | 2              |
| Advertisement                 | Recruitment poster Professionals 19.12.17 v2             | 19/12/2017  | 2              |
| Advertisement                 | Recruitment poster Users and Carers 19.12.17 v2          | 19/12/2017  | 2              |
| Participant Information Sheet | PIS_Interview_SU and carer_v2 19.12.17                   | 19/12/2017  | 2              |
| Participant Information Sheet | PIS_Interview_Staff_v2 19.12.17                          | 19/12/2017  | 2              |
